# Supplementary material for: High-Pressure Processing—Impacts on the Virulence and Antibiotic Resistance of Listeria monocytogenes Isolated from Food and Food Processing Environments
Source: MDPI journal article supplement (doi:10.3390/foods12213899), 2023-10-24
Supplement: s1 [file s1]

**Table S1.** Primers used in study.

|                                     | Primer      | Sequence 5'-3'           | Annealing temperature [°C] | Reference  |
|-------------------------------------|-------------|--------------------------|----------------------------|------------|
| Virulence associated genes (LIPI-1) | rt-actA-F   | ACAACGGTGAGCAAACAGGA     | 59.0                       | [1]        |
|                                     | rt-actA-R   | CGCTCCACTTGTAGAGTTGGT    |                            |            |
|                                     | rt-hly-F    | TGCCAGGTAACGCGAGAAAT     | 58.5                       |            |
|                                     | rt-hly-R    | TGGTGCCCCAGATGGAGATA     |                            |            |
|                                     | rt-mpl-F    | ATCAAGGTCCACGTCACACC     | 58.6                       |            |
|                                     | rt-mpl-R    | TCCTAAGCTGTCCTTGCTGC     |                            |            |
|                                     | rt-mprF-F   | GGAAGCAGCGATTGAAGAGG     | 59.4                       | this study |
|                                     | rt-mprF-R   | GGACGTCGACAAAACCTTCC     |                            |            |
|                                     | rt-osfX-F   | TGTAATCGCGCTATGTTCCGT    | 59.8                       |            |
|                                     | rt-osfX-R   | ACTCAATCTCCTTTGCATCGC    |                            |            |
|                                     | rt-plcA-F   | CCCATTAGGCGGGAAAGCAT     | 59.6                       |            |
|                                     | rt-plcA-R   | TCAGGTAGAGCGGACATCCA     |                            |            |
|                                     | rt-plcB-F   | AAAAGGGCGAAAGCGGACTA     | 57.9                       |            |
|                                     | rt-plcB-R   | ACCTGCCAAAGTTTGCTGTG     |                            |            |
|                                     | rt-prfA-F   | TTAGCGAGAACGGGACCATC     | 58.2                       |            |
|                                     | rt-prfA-R   | TAACGTATGCGGTAGCCTGC     |                            |            |
| Antibiotic resistance genes         | rt-dfrA-F   | AAGCTGTTTTAGCCCTTGCTG    | 59.8                       | [1]        |
|                                     | rt-dfrA-R   | GGAAACGCAGTATCAGCCTCA    |                            |            |
|                                     | rt-lin-F    | AGCGTTCAAACCAAGCAAGT     | 56.9                       |            |
|                                     | rt-lin-R    | GGAGCATACTGAGCAGCAAC     |                            |            |
|                                     | rt-fosX-F   | GTGGATGAATATATTGAGCGGATT | 56.9                       |            |
|                                     | rt-fosX-R   | CTTCGACTCTGGGACGTTCT     |                            |            |
|                                     | rt-sul-F    | ATGGTGGAAGATGGAGCAGC     | 59.0                       |            |
|                                     | rt-sul-R    | TCGGGTAATTTTCGTCCTGACA   |                            |            |
|                                     | rt-tetA_1-F | GGGCGCTTTGGGTACTCTTT     | 59.7                       |            |
|                                     | rt-tetA_1-R | TCCGCTCCTCTTGAGGTGTA     |                            |            |
|                                     | rt-tetA_3-F | CGACTGCCAATGCGCTAATC     | 58.1                       |            |
|                                     | rt-tetA_3-R | CCAATTAGCACGCCCCGAAAC    |                            |            |
|                                     | rt-tetC-F   | AAAAGAAGCGGACTCGAGCA     | 58.6                       |            |
|                                     | rt-tetC-R   | AGTGCCCGTTGGGTAATGTT     |                            |            |

[1] Zakrzewski, A.; Gajewska, J.; Chajęcka-Wierzchowska, W.; Zadernowska, A. Effect of sous-vide processing of fish on the virulence and antibiotic resistance of *Listeria monocytogenes*. NFS J. 2023, 31, 155–161. <https://doi.org/10.1016/j.nfs.2023.05.003>.
